# Supplementary material for: Intrinsic Variability in Shell and Soft Tissue Growth of the Freshwater Mussel Lampsilis siliquoidea
Source: PLoS One. 2014 Nov 20;9(11):e112252. doi: 10.1371/journal.pone.0112252 (PMC4239029; doi:10.1371/journal.pone.0112252)
Supplement: Appendix S1 — Data associated with this manuscript. Spreadsheets in this file contain linear shell dimensions, tissue masses, data to estimate precision and a meta-data page that identifies the column labels. (XLSX) [file pone.0112252.s001.xlsx]

## Sheet: Metadata
Variable names
L	Length in mm
W	Width in mm
H	Height in mm
LW	Length to weight ratio
WH	width to height ratio
LH	length to height ratio
Tin	Tin number (Only relevant for mussels where mass was also measured)
DM	Dry mass of the soft tissues in g
ShellDM	Dry mass of the shell in g
AFDM	Ashed mass of the soft tissues in g
ShellAFDM	Ashed mass of the shell in g
Precision Estimate Worksheet
Mussel ID	Unique identifier for mussel
L	Initial length measurement
H	Initial height measurement
W	Initial width measurement
L2	2nd length measurement
H2	2nd height measurement
W2	2nd width measurement
%DiffL	% difference between initial and 2nd length measurement
%DiffH	% difference between initial and 2nd height measurement
%DiffW	% difference between initial and 2nd width measurement

## Sheet: Dimensions
L	W	H	LW	WH	LH	Tin
21.79	6.91	12.22	3.1534	0.565466	1.78314	41A
37.93	12.53	21.33	3.02713	0.587436	1.77825	21A
27.17	9.45	16.07	2.87513	0.588052	1.69073	40A
33.45	10.62	17.54	3.14972	0.605473	1.90707	38A
35.76	11.61	19.13	3.0801	0.6069	1.86932	37A
22.29	7.45	12.27	2.99195	0.607172	1.81663	46A
32.89	11.47	18.87	2.86748	0.607843	1.74298	22A
25.86	8.77	14.42	2.94869	0.608183	1.79334	24A
32.36	10.84	17.68	2.98524	0.613122	1.83032	33A
32.14	11.25	18.17	2.85689	0.619152	1.76885	29A
37.17	12.68	20.39	2.93139	0.621873	1.82295	11A
37.78	13.43	21.42	2.8131	0.626984	1.76377	42A
33.9	11.78	18.71	2.87776	0.62961	1.81187	23A
33.15	11.01	17.47	3.0109	0.630223	1.89754	20A
23.93	8.23	12.92	2.90765	0.636997	1.85217	50A
35.53	12.6	19.78	2.81984	0.637007	1.79626	15A
33.68	11.12	17.45	3.02878	0.637249	1.93009	31A
22.51	7.72	12.08	2.9158	0.639073	1.86341	32A
25.49	8.86	13.82	2.87698	0.6411	1.84443	44A
19.59	6.99	10.88	2.80258	0.642463	1.80055	39A
34.55	12.44	19.23	2.77733	0.646906	1.79667	4A
28.71	10.77	16.56	2.66574	0.650362	1.7337	43A
31.24	10.84	16.64	2.88192	0.651442	1.8774	12A
19.5	7.14	10.93	2.73109	0.653248	1.78408	3A
33.84	11.29	17.14	2.99734	0.658693	1.97433	26A
27.78	10.12	15.36	2.74506	0.658854	1.80859	47A
33.15	11.6	17.53	2.85776	0.661723	1.89104	2A
37.33	13.28	20.06	2.81099	0.662014	1.86092	8A
38.92	13.46	20.33	2.89153	0.662076	1.91441	27A
38.1	12.83	19.36	2.9696	0.662707	1.96798	25A
34.19	12.41	18.66	2.75504	0.665059	1.83226	6A
36.87	12.96	19.45	2.84491	0.666324	1.89563	1A
34.33	12.7	18.96	2.70315	0.669831	1.81065	13A
26.82	10.23	15.22	2.6217	0.672142	1.76216	48A
35.59	12.53	18.64	2.84038	0.67221	1.90933	45A
32.41	12.88	19.08	2.5163	0.675052	1.69864	9A
34.05	11.71	17.31	2.90777	0.676488	1.96707	35A
34.63	12.95	19.1	2.67413	0.67801	1.81309	36A
26.33	11.07	16.23	2.3785	0.68207	1.6223	34A
30.19	10.64	15.5	2.83741	0.686452	1.94774	49A
36.21	14.95	21.76	2.42207	0.68704	1.66406	28A
31.73	11.61	16.88	2.73299	0.687796	1.87974	14A
38.17	13.86	20.14	2.75397	0.688183	1.89523	19A
33.22	11.58	16.81	2.86874	0.688876	1.9762	7A
29.22	10.83	15.71	2.69806	0.68937	1.85996	17A
32.62	12.13	17.54	2.6892	0.691562	1.85975	16A
33.95	12.43	17.87	2.7313	0.695579	1.89983	30A
39.57	14.74	21.15	2.68453	0.696927	1.87092	18A
27.61	9.84	13.97	2.80589	0.704367	1.97638	10A
27.35	11.42	15.22	2.39492	0.750329	1.79698	5A
38.07	13.66	20.26	2.78697	0.674235	1.87907	"na"
40.44	13.99	20.47	2.89064	0.683439	1.97557	"na"
43.27	15.58	23.56	2.77728	0.66129	1.83659	"na"
32.08	10.77	18.06	2.97864	0.596346	1.7763	"na"
35.76	13.55	20.69	2.63911	0.654906	1.72837	"na"
43.75	14.13	23.69	3.09625	0.596454	1.84677	"na"
44.18	15.05	23.57	2.93555	0.638524	1.87442	"na"
37.3	13.92	19.99	2.6796	0.696348	1.86593	"na"
39.4	13.82	21.59	2.85094	0.640111	1.82492	"na"
37.8	14.36	20.16	2.63231	0.712302	1.875	"na"
33.05	12.55	18.86	2.63347	0.665429	1.75239	"na"
44.61	15.52	23.29	2.87436	0.66638	1.91541	"na"
40.23	14.96	22.23	2.68917	0.672964	1.80972	"na"
36.55	12.73	18.94	2.87117	0.672122	1.92978	"na"
38.05	13.32	20.53	2.85661	0.648807	1.85339	"na"
43.06	14.59	21.7	2.95134	0.67235	1.98433	"na"
50.46	18.3	27.15	2.75738	0.674033	1.85856	"na"
38.54	13.42	20.25	2.87183	0.662716	1.90321	"na"
35.02	13.33	19.41	2.62716	0.686759	1.80422	"na"
39.93	13.55	21.69	2.94686	0.624712	1.84094	"na"
38.55	13.27	19.98	2.90505	0.664164	1.92943	"na"
40.92	14.52	22.21	2.81818	0.65376	1.84241	"na"
37.2	11.74	20.34	3.16865	0.577188	1.82891	"na"
31.69	10.19	16.99	3.10991	0.599765	1.86521	"na"
45.79	16.65	24.36	2.75015	0.683498	1.87972	"na"
43.6	16.93	22.5	2.57531	0.752444	1.93778	"na"
41.82	15.5	24.08	2.69806	0.643688	1.73671	"na"
46.66	15.7	24.87	2.97197	0.631283	1.87616	"na"
34.75	12.18	18.16	2.85304	0.670705	1.91355	"na"
46.23	15.04	25.25	3.0738	0.595644	1.83089	"na"
41.43	14.8	22.7	2.79932	0.651982	1.82511	"na"
37.27	12.13	20.06	3.07255	0.604686	1.85793	"na"
36.51	12.78	19.63	2.85681	0.651044	1.85991	"na"
36.43	12.59	19.87	2.89357	0.633619	1.83342	"na"
38.11	13.63	20.75	2.79604	0.656867	1.83663	"na"
39.96	14.44	22.1	2.76731	0.653394	1.80814	"na"
41.11	13.88	22.09	2.96182	0.628339	1.86102	"na"
35.26	11.37	19.13	3.10114	0.594354	1.84318	"na"
40.51	13.97	22.39	2.89979	0.623939	1.80929	"na"
36.05	11.66	18.87	3.09177	0.617912	1.91044	"na"
39.96	13.95	22.15	2.86452	0.629797	1.80406	"na"
41.23	14.21	22.07	2.90148	0.64386	1.86815	"na"
40.18	14.11	21.78	2.84763	0.647842	1.84481	"na"
39.13	13.85	20.43	2.82527	0.677925	1.91532	"na"
36.15	13.68	19.19	2.64254	0.712871	1.88379	"na"
39.77	14.32	21.18	2.77723	0.67611	1.87771	"na"
32.29	11.99	19.21	2.69308	0.624154	1.6809	"na"
44.25	15.08	24.14	2.93435	0.624689	1.83306	"na"
40.03	14.2	21.1	2.81901	0.672986	1.89716	"na"
36.77	14.12	20.13	2.60411	0.701441	1.82663	"na"
40.41	15.09	23.04	2.67793	0.654948	1.75391	"na"
38.84	13.98	21.66	2.77825	0.645429	1.79317	"na"
34.9	11.74	18.52	2.97274	0.633909	1.88445	"na"
45.95	16.91	24.6	2.71733	0.687398	1.86789	"na"
40.91	14.86	22.82	2.75303	0.651183	1.79273	"na"
44.37	16.1	23.23	2.7559	0.693069	1.91003	"na"
42.59	15	23.56	2.83933	0.636672	1.80772	"na"
34.71	12.73	18.88	2.72663	0.674258	1.83845	"na"
40.44	14.56	21.98	2.77747	0.66242	1.83985	"na"
43.74	15.09	23.35	2.89861	0.646253	1.87323	"na"
42.62	15.61	22.27	2.7303	0.700943	1.91379	"na"
38.97	13.23	20.72	2.94558	0.638514	1.88079	"na"
39.27	14.53	20.5	2.70268	0.70878	1.91561	"na"
44.79	15.64	24.19	2.86381	0.646548	1.85159	"na"
41.64	15	21.11	2.776	0.710564	1.97252	"na"
38.81	14.95	22.16	2.59599	0.674639	1.75135	"na"
37.23	12.23	20.86	3.04415	0.58629	1.78476	"na"
35.29	12.9	18.33	2.73566	0.703764	1.92526	"na"
34.88	12.45	20.11	2.80161	0.619095	1.73446	"na"
38.01	14.27	21.35	2.66363	0.668384	1.78033	"na"
37.81	12.73	20.43	2.97015	0.623103	1.85071	"na"
34.43	12.62	19.14	2.72821	0.659352	1.79885	"na"
40.72	14.85	22.06	2.74209	0.673164	1.84587	"na"
38.85	14.54	20.93	2.67194	0.694697	1.85619	"na"
39.97	14.18	19.74	2.81876	0.718338	2.02482	"na"
33.7	11.71	18.61	2.87788	0.629232	1.81085	"na"
36.84	12.29	19.5	2.99756	0.630256	1.88923	"na"
37.18	13.01	20.14	2.8578	0.645978	1.84608	"na"
38.7	13.92	21.31	2.78017	0.653214	1.81605	"na"
32.09	11.03	17.4	2.90934	0.633908	1.84425	"na"
33.88	12.41	18.96	2.73006	0.654536	1.78692	"na"
35.2	11.6	17.68	3.03448	0.656109	1.99095	"na"
33.93	11.05	18.23	3.07059	0.606144	1.86122	"na"
32.48	11.82	18.45	2.74788	0.64065	1.76043	"na"
41.38	14.32	22.15	2.88966	0.646501	1.86817	"na"
36.93	12.1	19.98	3.05207	0.605606	1.84835	"na"
28.47	11.56	17.14	2.4628	0.674446	1.66103	"na"
29.85	11.38	18.04	2.62302	0.63082	1.65466	"na"
34.68	12.27	19.14	2.82641	0.641066	1.81191	"na"
33.09	11.25	18.28	2.94133	0.615427	1.81018	"na"
28.47	11.61	18.02	2.4522	0.644284	1.57991	"na"
33.14	11.39	16.87	2.90957	0.675163	1.96443	"na"
32.45	11.68	17.86	2.77825	0.653975	1.81691	"na"
36.36	12.1	19.46	3.00496	0.621788	1.86845	"na"
30.53	11.45	18.31	2.66638	0.625341	1.66739	"na"
29.11	10.48	15.37	2.77767	0.681848	1.89395	"na"
29.8	11.12	17.39	2.67986	0.639448	1.71363	"na"
38.94	13.14	20.18	2.96347	0.65114	1.92963	"na"
29.54	10.62	16.09	2.78154	0.660037	1.83592	"na"
32.99	17.34	9.92	1.90254	1.74798	3.3256	"na"
37.9	13.61	20.8	2.78472	0.654327	1.82212	"na"
38.62	12.67	20.79	3.04815	0.609428	1.85762	"na"
39.09	14.02	21.39	2.78816	0.655446	1.82749	"na"
37.12	12.54	20.34	2.96013	0.616519	1.82498	"na"
42.49	15.16	23.19	2.80277	0.65373	1.83226	"na"
37.14	13.54	20.24	2.74298	0.668972	1.83498	"na"
36.57	12.91	20.72	2.83269	0.623069	1.76496	"na"
45	16.18	24.32	2.78121	0.665296	1.85033	"na"
35.99	13.03	20.44	2.76209	0.637476	1.76076	"na"
33.9	11.78	19.39	2.87776	0.60753	1.74832	"na"
41.64	13.56	22.73	3.0708	0.596568	1.83194	"na"
40.42	14.85	21.58	2.72189	0.688137	1.87303	"na"
35.18	12.9	19.54	2.72713	0.660184	1.80041	"na"
36.8	13.53	20.98	2.71988	0.6449	1.75405	"na"
41.88	14.35	23.33	2.91847	0.615088	1.79511	"na"
38.11	12.78	20.6	2.982	0.620388	1.85	"na"
34.48	13.27	19.3	2.59834	0.687565	1.78653	"na"
37.83	14.17	22.29	2.66972	0.635711	1.69717	"na"
38.51	13.98	21.87	2.75465	0.639232	1.76086	"na"
45.09	14.63	24.95	3.08202	0.586373	1.80721	"na"
41.52	14.94	24.24	2.77912	0.616337	1.71287	"na"
33.08	12.58	20.38	2.62957	0.617272	1.62316	"na"
38.03	13.05	21.45	2.91418	0.608392	1.77296	"na"
37.91	13.36	20.85	2.83757	0.640767	1.81823	"na"
38.57	18.05	25.23	2.13684	0.715418	1.52874	"na"
42.37	15.65	23.98	2.70735	0.652627	1.76689	"na"
40.18	14.69	21.14	2.73519	0.694891	1.90066	"na"
44.86	14.96	22.6	2.99866	0.661947	1.98496	"na"
38.29	13.39	20.69	2.8596	0.647173	1.85065	"na"
43.26	14.01	23.45	3.08779	0.597441	1.84478	"na"
43.76	14.51	23.52	3.01585	0.616922	1.86054	"na"
38.06	12.36	20.22	3.07929	0.611276	1.88229	"na"
45.18	14.97	24.27	3.01804	0.616811	1.86156	"na"
42.41	14.61	22.38	2.90281	0.652815	1.895	"na"
43.92	14.52	23.9	3.02479	0.607531	1.83766	"na"
37.08	12.52	21	2.96166	0.59619	1.76571	"na"
42.8	15.79	24.06	2.71058	0.656276	1.77889	"na"
39.58	12.19	21.98	3.24692	0.554595	1.80073	"na"
39.06	13.74	21.6	2.84279	0.636111	1.80833	"na"
37.53	12.39	20.05	3.02906	0.617955	1.87182	"na"
36.77	12.68	19.68	2.89984	0.644309	1.86839	"na"
41.1	13.83	22.32	2.9718	0.619624	1.8414	"na"
37.49	13.06	18.47	2.8706	0.707093	2.02978	"na"
41.86	16.62	24.27	2.51865	0.684796	1.72476	"na"
37.45	12.73	20.52	2.94187	0.62037	1.82505	"na"
39.09	13.44	21.2	2.90848	0.633962	1.84387	"na"
40.33	13.71	20.89	2.94165	0.656295	1.93059	"na"
42.24	15.83	22.76	2.66835	0.695518	1.85589	"na"
48.87	17.4	28.14	2.80862	0.618337	1.73667	"na"
36.53	13.35	18.92	2.73633	0.705603	1.93076	"na"
36.12	14.39	20.48	2.51008	0.702637	1.76367	"na"
42.3	13.52	22.27	3.1287	0.607095	1.89942	"na"
37.94	14.13	21.41	2.68507	0.659972	1.77207	"na"
39.65	13.9	20.78	2.85252	0.668912	1.90808	"na"
35.26	12.83	19.3	2.74825	0.664767	1.82694	"na"
37.98	13.6	19.99	2.79265	0.68034	1.89995	"na"
41.16	14.19	22.33	2.90063	0.635468	1.84326	"na"
35.39	13.17	19.91	2.68717	0.661477	1.7775	"na"
37.38	12.72	20.27	2.93868	0.627528	1.8441	"na"
40.83	13.17	21.89	3.10023	0.601645	1.86524	"na"
35.34	12.13	19.04	2.91344	0.63708	1.85609	"na"
42.49	15.24	22.28	2.78806	0.684022	1.90709	"na"
38.36	12.97	20.41	2.95759	0.635473	1.87947	"na"
34.92	12.44	19.25	2.80707	0.646234	1.81403	"na"
42.11	14.81	22.2	2.84335	0.667117	1.89685	"na"
38.47	13.78	20.53	2.79173	0.671213	1.87384	"na"
37.49	14.36	20.5	2.61072	0.700488	1.82878	"na"
36.35	12.6	18.78	2.88492	0.670927	1.93557	"na"
39.3	14.3	21.5	2.74825	0.665116	1.82791	"na"
40.97	14.38	23.33	2.8491	0.616374	1.75611	"na"
40.91	14.25	20.68	2.87088	0.689072	1.97824	"na"
41.13	14.92	22.02	2.7567	0.677566	1.86785	"na"
37.04	12.78	20.5	2.89828	0.623415	1.80683	"na"
40.66	14.18	22.6	2.86742	0.627434	1.79912	"na"
37.86	14.48	21.38	2.61464	0.677268	1.77081	"na"
40.4	13.86	21.42	2.91486	0.647059	1.88609	"na"
36.2	13.77	19.04	2.6289	0.723214	1.90126	"na"
32.36	10.9	17.57	2.96881	0.620376	1.84178	"na"
35.76	12.34	19.38	2.89789	0.636739	1.8452	"na"
36.3	12.77	19.63	2.8426	0.650535	1.84921	"na"
41.02	15.26	22.27	2.68807	0.685227	1.84194	"na"
44.39	16.43	23.19	2.70177	0.708495	1.91419	"na"
37.5	12.81	20.77	2.9274	0.616755	1.80549	"na"
36.66	12.99	19.07	2.82217	0.681175	1.92239	"na"
35.45	13.48	18.58	2.62982	0.725511	1.90797	"na"
38.13	13.88	21.73	2.74712	0.638748	1.75472	"na"
36.66	11.78	18.87	3.11205	0.624271	1.94277	"na"
34.38	11.64	19.21	2.95361	0.605934	1.78969	"na"
42.75	14.67	23.4	2.91411	0.626923	1.82692	"na"
31.91	11.69	17.62	2.72968	0.663451	1.81101	"na"
43.67	14.73	23.45	2.9647	0.628145	1.86226	"na"
35.19	13.2	18.51	2.66591	0.713128	1.90113	"na"
35.72	12.38	19.35	2.8853	0.639793	1.84599	"na"
35.58	12.94	19.29	2.74961	0.670814	1.84448	"na"
31.64	11.88	17.32	2.6633	0.685912	1.82679	"na"
32.89	11.81	18.64	2.78493	0.633584	1.76448	"na"
31.14	10.55	17.6	2.95166	0.599432	1.76932	"na"
30.7	10.86	17.24	2.82689	0.62993	1.78074	"na"
37.57	13.39	19.49	2.80583	0.687019	1.92766	"na"
33.55	12.39	18.2	2.70783	0.680769	1.84341	"na"
37.82	12.58	20.43	3.00636	0.615761	1.8512	"na"
31.1	13.48	20.05	2.30712	0.672319	1.55112	"na"
36.95	13.1	20.64	2.82061	0.63469	1.79021	"na"
33.06	11.57	17.88	2.85739	0.647092	1.84899	"na"
40.53	14.48	22.44	2.79903	0.645276	1.80615	"na"
40.54	14.67	22.75	2.76346	0.644835	1.78198	"na"
30.78	10.46	16.81	2.94264	0.622249	1.83105	"na"
36.5	12.07	21.33	3.02403	0.56587	1.7112	"na"
32.18	12.72	18.7	2.52987	0.680214	1.72086	"na"
39.5	12.93	22.02	3.05491	0.587193	1.79382	"na"
33.77	12.28	18.47	2.75	0.664862	1.82837	"na"
29.57	12.01	17.93	2.46211	0.669827	1.64919	"na"
32.84	10.42	17.73	3.15163	0.587704	1.85223	"na"
33.74	12.54	18.37	2.69059	0.682635	1.83669	"na"
32.6	11.99	18.13	2.71893	0.661335	1.79812	"na"
30.38	11.88	17.39	2.55724	0.683151	1.74698	"na"
36.5	12.6	19.71	2.89683	0.639269	1.85185	"na"
37.57	13.67	20.86	2.74835	0.655321	1.80105	"na"
32.54	10.89	16.96	2.98806	0.642099	1.91863	"na"
36.78	12.62	20	2.91442	0.631	1.839	"na"
32.98	10.61	17.45	3.10839	0.608023	1.88997	"na"
42.37	14.5	22.25	2.92207	0.651685	1.90427	"na"
34.83	13.85	19.58	2.5148	0.707354	1.77886	"na"
35.01	13.66	19.61	2.56296	0.696583	1.78531	"na"
40.47	13.84	21.92	2.92413	0.631387	1.84626	"na"

## Sheet: DryMassSamples
L	W	H	LW	WH	LH	DM	ShellDM	AFDM	ShellAFDM	Tin
21.79	6.91	12.22	3.1534	0.565466	1.78314	0.0313	0.4159	0.0065	0.3891	41A
37.93	12.53	21.33	3.02713	0.587436	1.77825	0.3024	2.792	0.0352	2.6458	21A
27.17	9.45	16.07	2.87513	0.588052	1.69073	0.0771	1.1338	0.0109	1.0652	40A
33.45	10.62	17.54	3.14972	0.605473	1.90707	0.1755	1.4022	0.0225	1.3056	38A
35.76	11.61	19.13	3.0801	0.6069	1.86932	0.2162	1.8555	0.0268	1.7454	37A
22.29	7.45	12.27	2.99195	0.607172	1.81663	0.0407	0.4789	0.0064	0.4445	46A
32.89	11.47	18.87	2.86748	0.607843	1.74298	0.1777	2.1454	0.0236	2.0255	22A
25.86	8.77	14.42	2.94869	0.608183	1.79334	0.0947	0.9423	0.0111	0.8812	24A
32.36	10.84	17.68	2.98524	0.613122	1.83032	0.1243	1.5845	0.0132	1.4942	33A
32.14	11.25	18.17	2.85689	0.619152	1.76885	0.2092	1.7316	0.0226	1.6275	29A
37.17	12.68	20.39	2.93139	0.621873	1.82295	0.247	2.3418	0.0304	2.2164	11A
37.78	13.43	21.42	2.8131	0.626984	1.76377	0.3866	2.666	0.0385	2.5139	42A
33.9	11.78	18.71	2.87776	0.62961	1.81187	0.1898	2.0908	0.0231	1.974	23A
33.15	11.01	17.47	3.0109	0.630223	1.89754	0.191	1.7531	0.0187	1.6553	20A
23.93	8.23	12.92	2.90765	0.636997	1.85217	0.0497	0.6746	0.0069	0.6333	50A
35.53	12.6	19.78	2.81984	0.637007	1.79626	0.2879	2.3221	0.032	2.1913	15A
33.68	11.12	17.45	3.02878	0.637249	1.93009	0.1797	1.801	0.0186	1.706	31A
22.51	7.72	12.08	2.9158	0.639073	1.86341	0.0454	0.7085	0.0085	0.6652	32A
25.49	8.86	13.82	2.87698	0.6411	1.84443	0.0908	0.8717	0.0112	0.8162	44A
19.59	6.99	10.88	2.80258	0.642463	1.80055	0.0294	0.4152	0.0046	0.3893	39A
34.55	12.44	19.23	2.77733	0.646906	1.79667	0.2058	2.0285	0.0239	1.9077	4A
28.71	10.77	16.56	2.66574	0.650362	1.7337	0.1138	1.2685	0.0156	1.1862	43A
31.24	10.84	16.64	2.88192	0.651442	1.8774	0.1853	1.6346	0.0191	1.5382	12A
19.5	7.14	10.93	2.73109	0.653248	1.78408	0.0267	0.4131	0.0038	0.3901	3A
33.84	11.29	17.14	2.99734	0.658693	1.97433	0.1601	1.5654	0.0185	1.4746	26A
27.78	10.12	15.36	2.74506	0.658854	1.80859	0.1115	1.2863	0.0155	1.2087	47A
33.15	11.6	17.53	2.85776	0.661723	1.89104	0.131	1.6607	0.0212	1.5632	2A
37.33	13.28	20.06	2.81099	0.662014	1.86092	0.288	2.6658	0.0307	2.527	8A
38.92	13.46	20.33	2.89153	0.662076	1.91441	0.3377	3.0461	0.0346	2.8818	27A
38.1	12.83	19.36	2.9696	0.662707	1.96798	0.2915	2.5872	0.0279	2.4413	25A
34.19	12.41	18.66	2.75504	0.665059	1.83226	0.2699	1.936	0.03	1.8226	6A
36.87	12.96	19.45	2.84491	0.666324	1.89563	0.2407	2.163	0.0299	2.0362	1A
34.33	12.7	18.96	2.70315	0.669831	1.81065	0.3096	2.3743	0.0294	2.2376	13A
26.82	10.23	15.22	2.6217	0.672142	1.76216	0.134	1.2247	0.0135	1.1497	48A
35.59	12.53	18.64	2.84038	0.67221	1.90933	0.2281	2.1539	0.0227	2.0363	45A
32.41	12.88	19.08	2.5163	0.675052	1.69864	0.1997	2.5772	0.0256	2.4476	9A
34.05	11.71	17.31	2.90777	0.676488	1.96707	0.2486	1.8637	0.0274	1.7548	35A
34.63	12.95	19.1	2.67413	0.67801	1.81309	0.2708	2.1467	0.0307	2.0197	36A
26.33	11.07	16.23	2.3785	0.68207	1.6223	0.1223	1.3196	0.0156	1.2301	34A
30.19	10.64	15.5	2.83741	0.686452	1.94774	0.1119	1.2979	0.0136	1.2154	49A
36.21	14.95	21.76	2.42207	0.68704	1.66406	0.3713	3.2255	0.0467	3.0503	28A
31.73	11.61	16.88	2.73299	0.687796	1.87974	0.1796	1.6051	0.0239	1.4952	14A
38.17	13.86	20.14	2.75397	0.688183	1.89523	0.3084	2.9166	0.0367	2.7583	19A
33.22	11.58	16.81	2.86874	0.688876	1.9762	0.1937	1.6863	0.0231	1.5831	7A
29.22	10.83	15.71	2.69806	0.68937	1.85996	0.1475	1.4759	0.0143	1.3949	17A
32.62	12.13	17.54	2.6892	0.691562	1.85975	0.2333	1.8759	0.0235	1.7633	16A
33.95	12.43	17.87	2.7313	0.695579	1.89983	0.2669	2.1153	0.0259	1.9997	30A
39.57	14.74	21.15	2.68453	0.696927	1.87092	0.4133	3.2056	0.0408	3.0367	18A
27.61	9.84	13.97	2.80589	0.704367	1.97638	0.1106	1.0752	0.0128	1.0071	10A
27.35	11.42	15.22	2.39492	0.750329	1.79698	0.1341	1.2262	0.0139	1.1466	5A

## Sheet: PrecisionEstimate
Mussel ID	L	H	W	L2	H2	W2	%DiffL	%DiffH	%DiffW
661 dot	50.292	28.194	16.51	50.546	28.194	16.51	0.505051	0	0
751 dot	51.816	28.194	18.288	51.562	28.448	18.288	0.490196	0.900901	0
1211 dot	33.274	18.542	11.176	33.274	18.542	11.43	0	0	2.27273
14251 dot	29.21	16.51	9.652	29.21	16.51	9.652	0	0	0
21341 dot	31.75	17.78	9.906	31.75	17.78	9.906	0	0	0
29171 dot	29.21	16.002	8.89	29.21	16.002	8.89	0	0	0
31101 dot	32.004	18.288	10.668	32.004	18.288	10.668	0	0	0
32112 dots	36.576	20.066	12.192	36.576	20.066	11.938	0	0	2.08333
5091 dot	33.274	18.034	10.668	33.274	17.78	10.668	0	1.40845	0
54291 dot	29.718	16.51	10.16	29.718	16.51	10.16	0	0	0
60361 dot	29.21	16.764	9.144	29.464	16.51	9.144	0.869565	1.51515	0
64181 dot	31.496	17.272	9.652	31.496	17.272	9.652	0	0	0
